# Supplementary material
Source: PubMed Central journal article supplement (PMC3696552)
Supplement: JCI66827sd.pdf [file JCI66827sd.pdf]

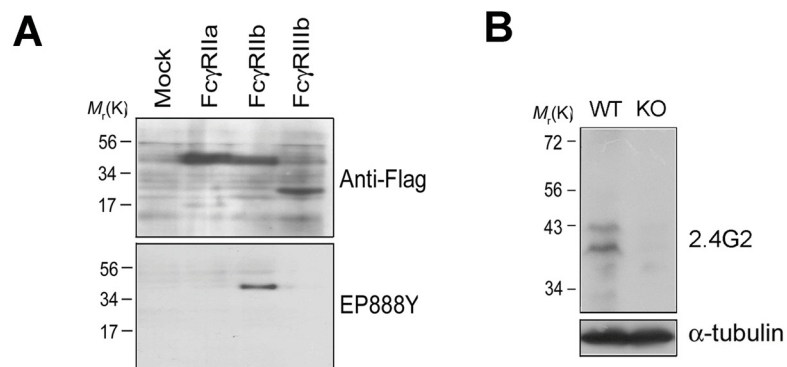

**Supplemental Figure 1.** Detection of human Fc $\gamma$ RIIb in cells and mouse Fc $\gamma$ RIIb in the brain tissues.

**(A)** Specificity of anti-human Fc $\gamma$ RIIb antibody. HEK293T cells were transfected with flag-tagged human Fc $\gamma$ Rs and analyzed by Western blotting using anti-Fc $\gamma$ RIIb (EP888Y) and anti-flag antibodies. **(B)** Detection of Fc $\gamma$ RIIb in the mouse brains using anti-Fc $\gamma$ RIIb antibody. Adult brains from wild type (WT) and Fc $\gamma$ RIIb knockout (KO) mice were analyzed by Western blotting using anti-Fc $\gamma$ RIIb (2.4G2) and anti- $\alpha$ -tubulin antibodies. Fc $\gamma$ RIIb is detected in the brain of WT mice, but not in Fc $\gamma$ RIIb KO mice.

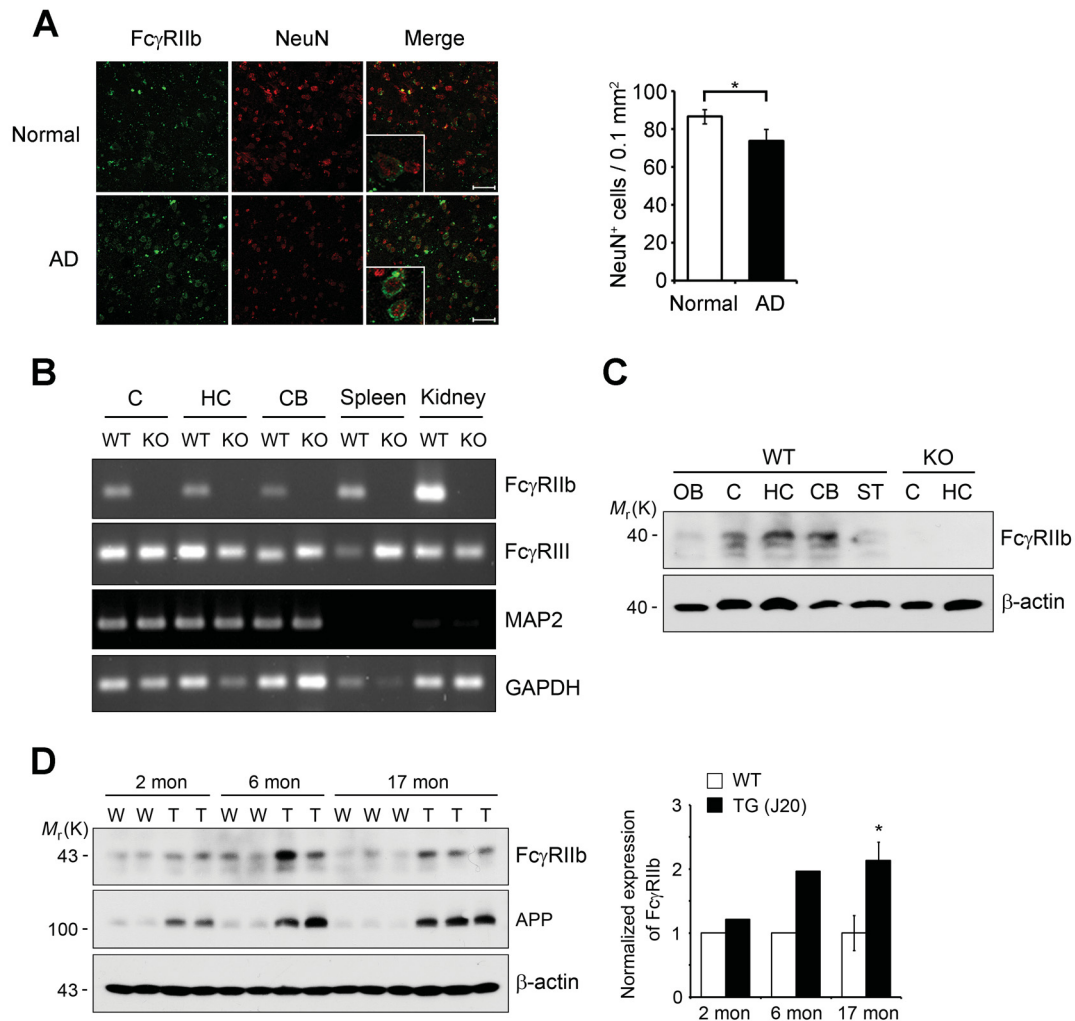

**Supplemental Figure 2.** Neuronal distribution of Fc $\gamma$ RIIb and increased Fc $\gamma$ RIIb in the hippocampus of AD brains and cortex of J20 mice.

(A) Immunohistochemical detection of Fc $\gamma$ RIIb in the NeuN-positive hippocampal neurons of AD patients. Tissue samples from normal and AD patients ( $n=3$  for each group) were immunostained using anti-Fc $\gamma$ RIIb (EP888Y) and anti-NeuN antibodies and examined under a confocal microscope. Scale bars, 50  $\mu$ m (*left*). The numbers of NeuN-positive cells were quantified (*right*). (B, C) Neuronal expression of Fc $\gamma$ RIIb in the mouse brain tissues. Total RNA from the indicated tissues of WT and Fc $\gamma$ RIIb KO mice was isolated for RT-PCR analysis using synthetic primers for Fc $\gamma$ RIIb, Fc $\gamma$ RIII, MAP2 (neuronal marker) and GAPDH (B). The lysates from WT and Fc $\gamma$ RIIb KO mice were subjected to Western blotting using anti-Fc $\gamma$ RIIb (2.4G2) and anti- $\beta$ -actin antibodies (C). (D) Increased Fc $\gamma$ RIIb in the cortex of J20 mice. Cortical homogenates from 2, 6, 17 month-old WT (W) and J20 transgenic mice (T) were subjected to Western blotting. APP antibody was used as a marker for transgenic mice (*left*). Levels of Fc $\gamma$ RIIb were quantified by densitometric measurement (*right*). Values are mean  $\pm$  s.d.; \* $P < 0.02$ , two-tailed  $t$ -test (17-month-old samples).

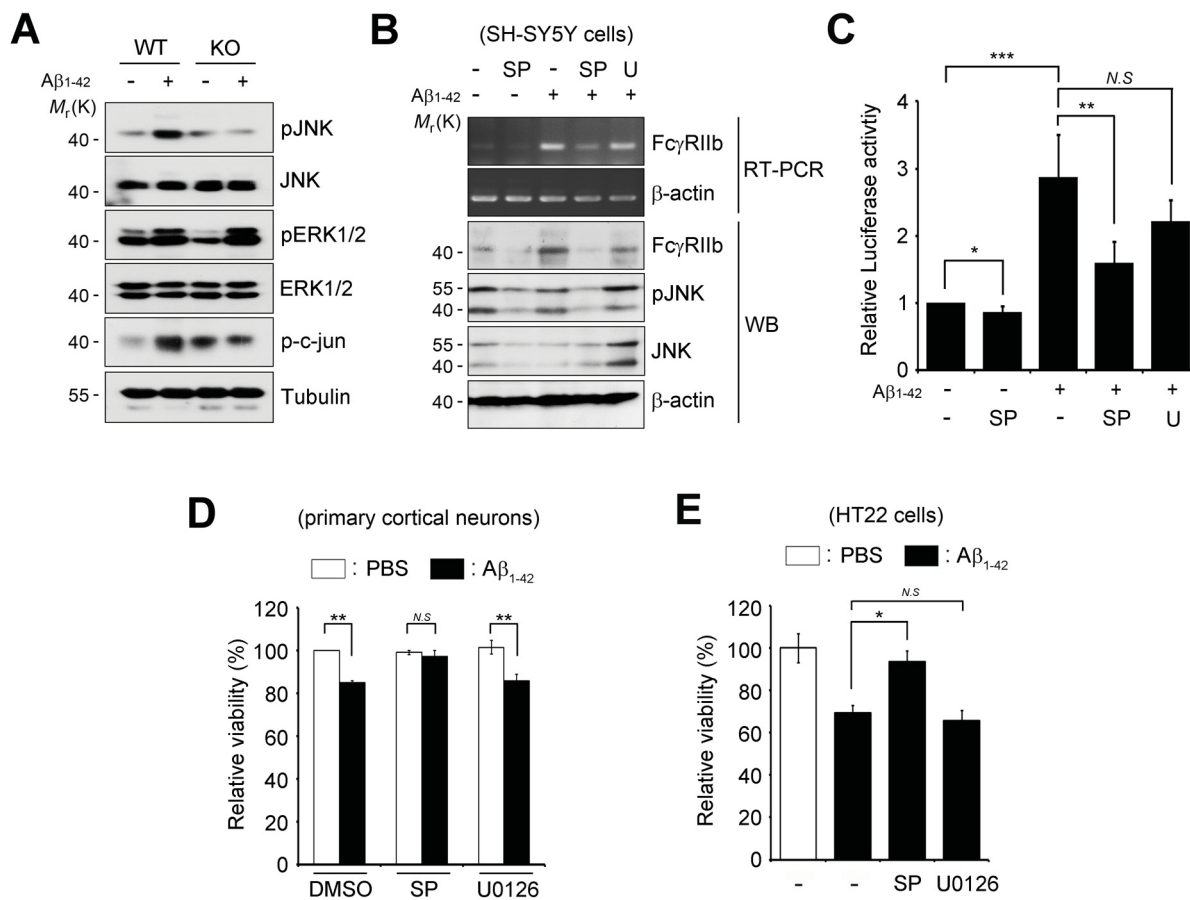

### Supplemental Figure 3. Regulation of Aβ-induced FcγRIIb expression by JNK-c-Jun pathway.

(A) FcγRIIb deficiency prevents the activation of JNK-c-Jun pathway by Aβ<sub>1-42</sub>. Mouse primary cortical neurons from WT or FcγRIIb KO embryos (DIV 8) were incubated with 5 μM Aβ<sub>1-42</sub> for 12 h. Cell extracts were subjected to Western blotting using anti-pJNK, total anti-JNK, anti-pERK1/2, total anti-ERK1/2, anti-p-c-Jun and anti-α-tubulin antibodies. (B) The increased expression of FcγRIIb by Aβ<sub>1-42</sub> is prevented by JNK inhibitor. SH-SY5Y cells were pre-treated with 5 μM SP600125 or 10 μM U0126 for 2 h, and then further incubated with 5 μM Aβ<sub>1-42</sub> for 12 h. Total RNA was isolated for RT-PCR analysis using synthetic primers for FcγRIIb and β-actin (*upper*). Cell lysates were subjected to Western blotting (*lower*) using anti-FcγRIIb (EP888Y), anti-pJNK, total anti-JNK and anti-β-actin antibodies. (C) Suppression of Aβ-induced luciferase activity of FcγRIIb promoter-luciferase construct by JNK inhibitor. SH-SY5Y cells were cotransfected with FcγRIIb promoter-luciferase construct and pLacZ for 24 h. Cells were pre-treated with 5 μM SP600125 or 10 μM U0126 for 2 h, and then further incubated with 5 μM Aβ<sub>1-42</sub> for 12 h in the absence or presence of the inhibitors. The luciferase activity in cell lysates was determined using a luminometer and then normalized by that of β-galactosidase. (D, E) Aβ-induced cell death is blocked by JNK inhibitor. Primary cortical neurons (DIV 8) (D) or HT22 cells (E) were pre-treated with 5 μM SP600125 or 10 μM U0126 for 2 h, and then incubated with 5 μM Aβ<sub>1-42</sub> for 48 h. The cell death was determined by using Calcein-AM (D) or MTT assay (E). Data are mean ± s.d. (n=4). \**p* < 0.01, \*\**p* < 0.005, unpaired *t*-test.

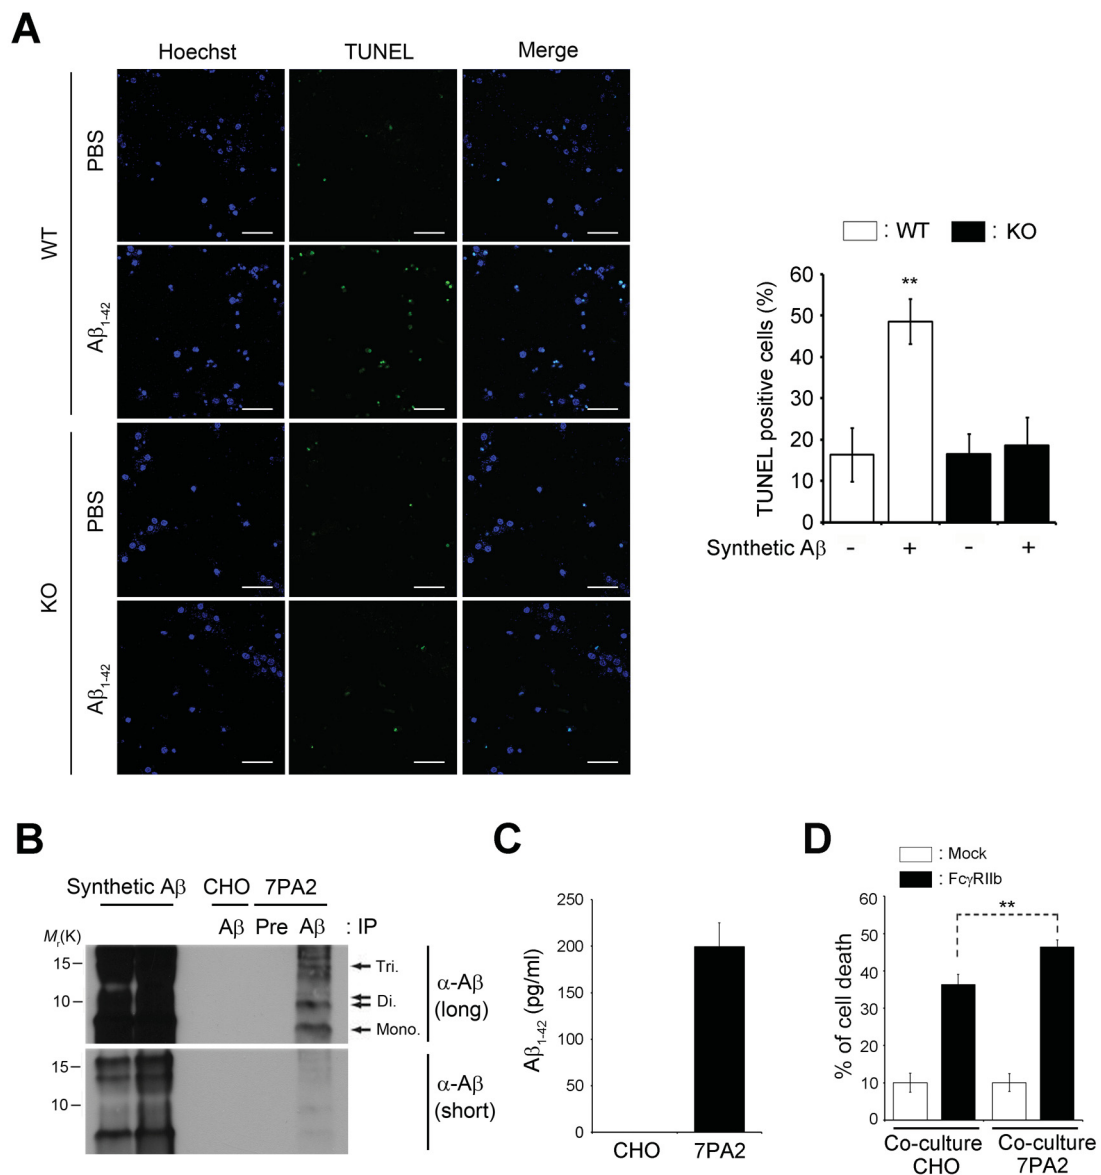

**Supplemental Figure 4. FcγRIIb KO neurons are resistant to Aβ toxicity.**

(A) FcγRIIb KO neurons are resistant to synthetic Aβ toxicity. Primary hippocampal neurons were cultured from WT and FcγRIIb KO embryos and then incubated with 5 μM synthetic Aβ<sub>1-42</sub> oligomers for 2 days (from 5 DIV), after which neuronal apoptosis was determined using TUNEL assay. Data are mean ± s.d. (n=3-5 per groups). \*\**P* < 0.001, one-way ANOVA. (B, C) Detection and quantification of cell-derived Aβ. CHO- and 7PA2-conditioned medium (CM) were immunoprecipitated with pre-immune (Pre) or 6E10 (Aβ) antibodies, and the immunoprecipitates were western blotted with anti-Aβ antibody (4G8). Synthetic Aβ was used as a loading control (50 ng, lane 1; 200 ng, lane 2). Mono, monomer; Di, dimer; Tri, trimer (B). Levels of total Aβ<sub>1-42</sub> in CHO- and 7PA2-CM determined by ELISA (C). (D) Induction of cell death by 7PA2-CM in FcγRIIb-expressing HT22 cells. HT22 cells were grown on glass cover slip and transfected with GFP (Mock) or FcγRIIb-GFP (FcγRIIb) for 12 h. Then, cover slips were transferred into the plates containing a ~80 % confluent cell layer of CHO or 7PA2 cells. After 36 h of co-cultivation, cell death was determined as described previously. Values are mean ± s.d. (n=3). \*\**P* < 0.005, two-tailed *t*-test.

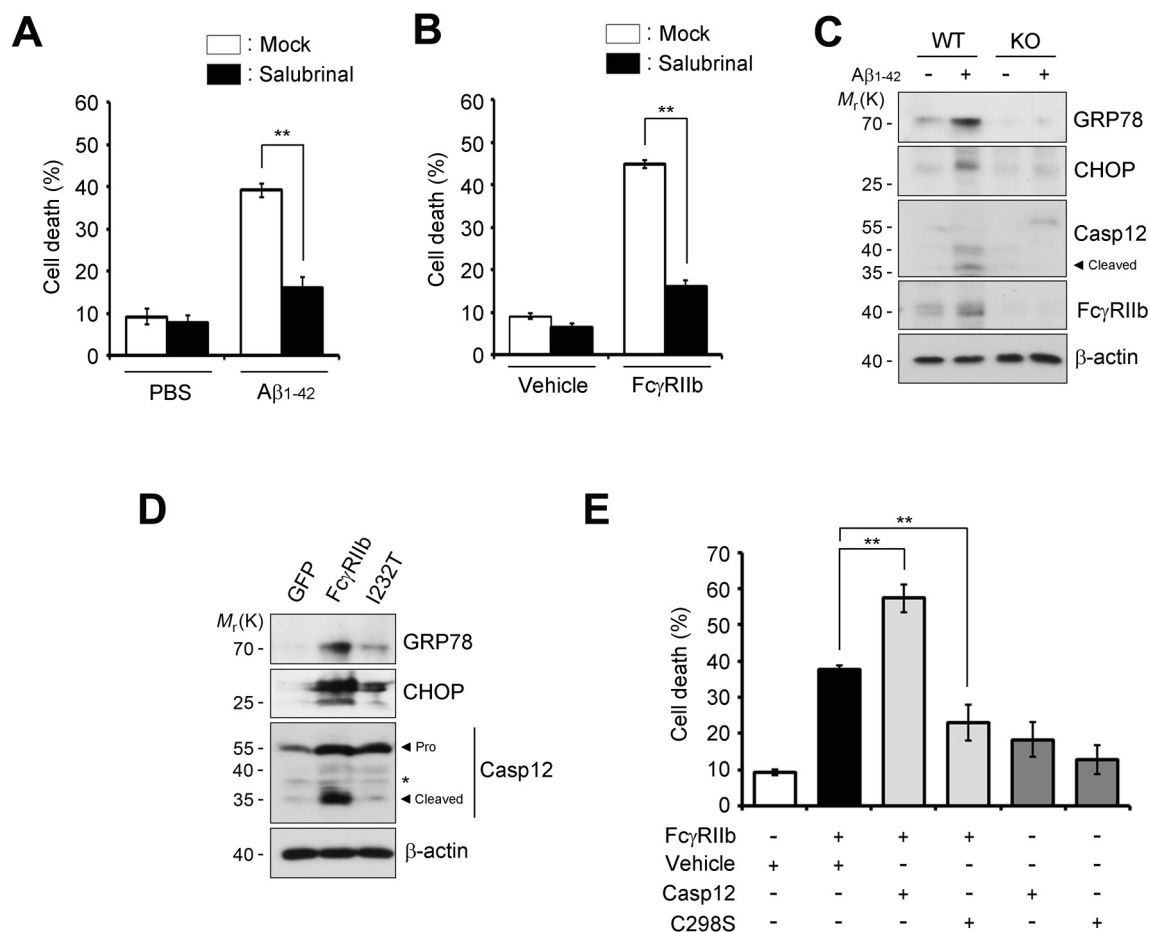

**Supplemental Figure 5.** FcγRIIb mediates Aβ<sub>1-42</sub> neurotoxicity through ER stress and caspase-12 activation.

(**A, B**) Inhibition of Aβ- and FcγRIIb-induced cell death by Salubrinal. HT22 cells were pre-treated with 75 μM Salubrinal for 2 h, and then incubated with 5 μM Aβ<sub>1-42</sub> oligomers for 48 h (A) or transfected with either pEGFP-N1 (Vehicle) or pFcγRIIb-GFP for 36 h in the absence or presence of 75 μM Salubrinal (B). Bars depict the incidence of cell death. Values are mean ± s.d.; n=3. \*\**P* < 0.005, unpaired *t*-test. (C) FcγRIIb deficiency prevents ER stress response and caspase-12 activation by Aβ<sub>1-42</sub>. Mouse primary cortical neurons from WT or FcγRIIb KO embryos (DIV 8) were incubated with 5 μM Aβ<sub>1-42</sub> for 48 h. Cell extracts were subjected to Western blotting using anti-GRP78, anti-CHOP, anti-caspase-12, anti-FcγRIIb and anti-β-actin antibodies. (D) FcγRIIb, but not I232T mutant, induces ER stress and caspase-12 activation. HT22 cells were transfected with pEGFP-N1, pFcγRIIb-GFP or pFcγRIIb I232T-GFP for 36 h and cell lysates were subjected to Western blotting using anti-GRP78, anti-CHOP, anti-caspase-12, anti-GFP and anti-β-actin antibodies. (E) Suppression of FcγRIIb-induced cell death by caspase-12 activity-dead mutant. HT22 cells were cotransfected with pFcγRIIb and pEGFP-N1 (Vehicle), pCaspase-12-GFP (Casp12) or pCaspase-12 C298S-GFP (C298S) for 36 h. The cell death was determined based on the morphology of GFP-positive cells under a fluorescence microscope. Values are mean ± s.d.; n=3. \*\**P* < 0.001, unpaired *t*-test.

**A**

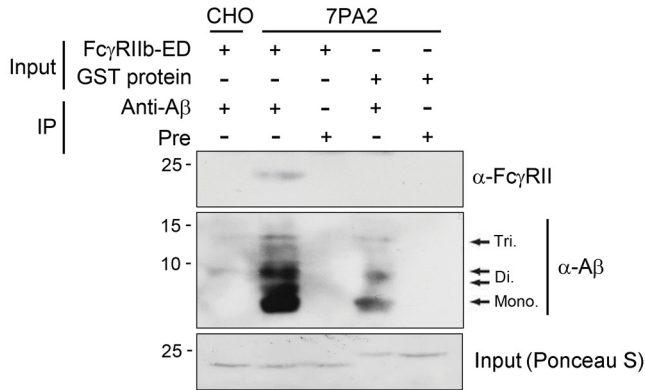

**B**

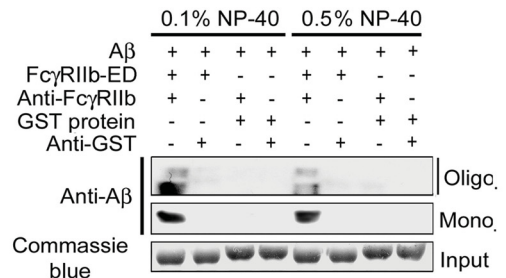

**C**

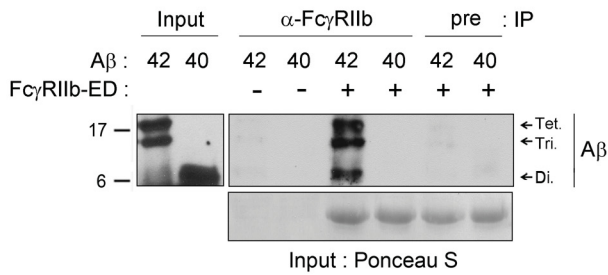

**D**

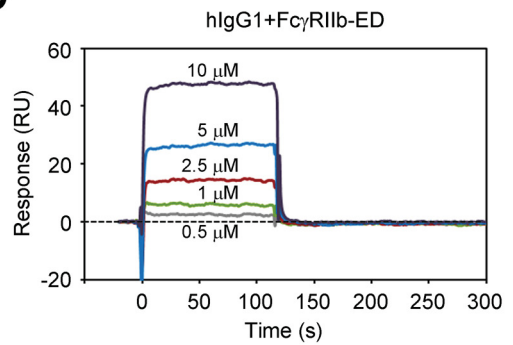

**E**

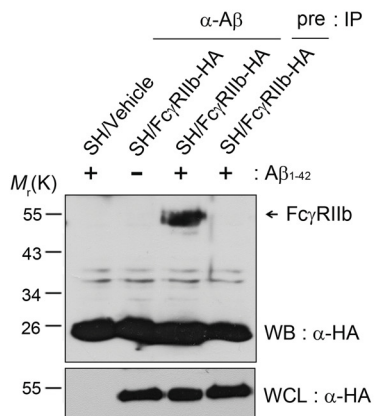

**F**

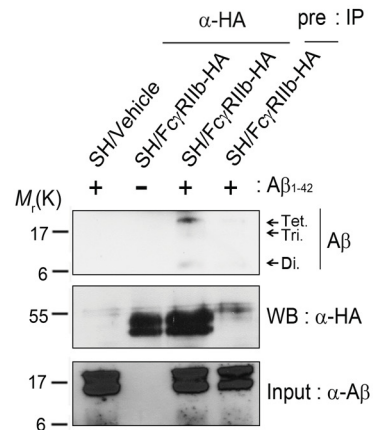

**Supplemental Figure 6.** Interaction of Fc $\gamma$ RIIb with A $\beta$ <sub>1-42</sub>.

**(A, B)** *In vitro* binding of Fc $\gamma$ RIIb-ED protein to A $\beta$ . Purified GST and hFc $\gamma$ RIIb-ED proteins were incubated with CHO- or 7PA2-CM for 6 h (A) or synthetic A $\beta$ <sub>1-42</sub> for 2 h (B), and then immunoprecipitated with anti-A $\beta$  (A) or anti-Fc $\gamma$ RIIb antibody (B). The precipitates were separated with SDS-PAGE and analyzed by Western blotting using anti-Fc $\gamma$ RII (AT10) or Nu-1 antibody. Monomeric (Mono.), dimeric (Di.) and trimeric (Tri.) forms of A $\beta$  are indicated. **(C)** Selective interaction of oligomeric A $\beta$ <sub>1-42</sub> with Fc $\gamma$ RIIb *in vitro*. Purified hFc $\gamma$ RIIb-ED protein was incubated with oligomeric A $\beta$ <sub>1-42</sub> or A $\beta$ <sub>1-40</sub> for 2 h and then immunoprecipitated with anti-Fc $\gamma$ RIIb antibody or pre-immune (pre). Precipitates were analyzed by Western blotting using anti-A $\beta$  (Nu-1) antibody. Oligomeric forms [dimer (Di.), trimer (Tri.) and tetramer (Tet.)] of A $\beta$  are indicated. **(D)** Interaction of Fc $\gamma$ RIIb-ED with IgG1 with low affinity in SPR analysis. BSA or human IgG1 were immobilized on a CM5 chip® and their interactions with hFc $\gamma$ RIIb-ED protein (0.5-10  $\mu$ M) were analyzed using Biacore3000®. **(E, F)** Cellular interaction between Fc $\gamma$ RIIb and A $\beta$  oligomers. SH-SY5Y cells that stably express hFc $\gamma$ RIIb-HA were left untreated or incubated with 1  $\mu$ M A $\beta$ <sub>1-42</sub> for 1 h. Cell lysates were immunoprecipitated with anti-A $\beta$  (Nu-1) antibody (D) or anti-HA antibody (E). Murine pre-immune (pre) served as a negative control. Immunoprecipitated proteins were then analyzed with Western blotting using anti-HA antibody (D) or anti-A $\beta$  antibody (E). WCL, whole cell lysates.

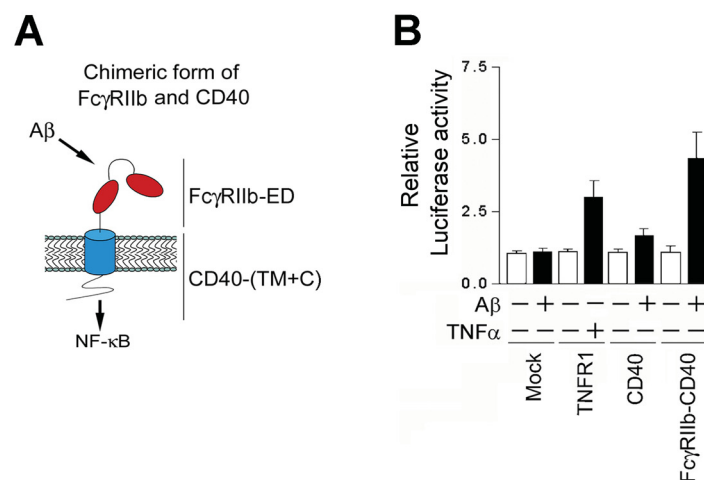

**Supplemental Figure 7.** A rFc $\gamma$ RIIb-CD40 chimera reporter assay showing the interaction of Fc $\gamma$ RIIb with A $\beta$ <sub>1-42</sub>.

**(A)** Schematic diagram of a reporter assay using rFc $\gamma$ RIIb-CD40 chimera. Rat Fc $\gamma$ RIIb-ED (rFc $\gamma$ RIIb) was fused to the transmembrane and cytosolic regions (TM+C) of CD40. **(B)** Reporter activity showing the binding of A $\beta$ <sub>1-42</sub> to Fc $\gamma$ RIIb-ED in cells. NIH3T3 cells were cotransfected with pNF- $\kappa$ B-luciferase, p $\beta$ act-lacZ and either pEGFP, pTNF receptor1 (TNFR1), pCD40 or pFc $\gamma$ RIIb-CD40, and then incubated for 24 h with 5  $\mu$ M A $\beta$ <sub>1-42</sub> or 10 ng/ml murine TNF- $\alpha$  (mean  $\pm$  s.d.; n=3).



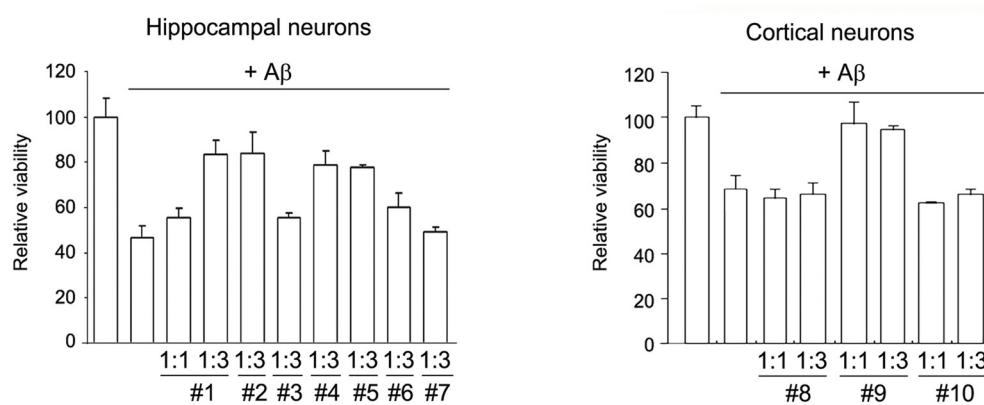

**Supplemental Figure 8.** Inhibition of A $\beta$  neurotoxicity by Fc $\gamma$ RIIb- or A $\beta$ -derived synthetic peptides.

Effects of Fc $\gamma$ RIIb- or A $\beta$ -derived synthetic peptides on A $\beta$ -induced cell death. Beginning at 7 days *in vitro* (DIV), primary hippocampal neurons were incubated for 2 days with 5  $\mu$ M A $\beta$ <sub>1-42</sub> w/wo the indicated ratios (to A $\beta$ <sub>1-42</sub>) of A $\beta$ <sub>1-9</sub> WT or mutant synthetic peptide (#1 to #7 shown in Fig. 3 D) (*left*). Beginning at 5 DIV, primary cortical neurons were incubated for 2 days with 5  $\mu$ M A $\beta$ <sub>1-42</sub> w/wo Fc $\gamma$ RIIb-derived WT and mutant synthetic peptides (#8 to #10 shown in Fig. 3 D) (*right*). Relative viability was determined by counting neurons for dead cells after staining with Calcein-AM and neurons showing intact cell bodies and neurites for live cells. Bars represent mean  $\pm$  s.d. (n=3).

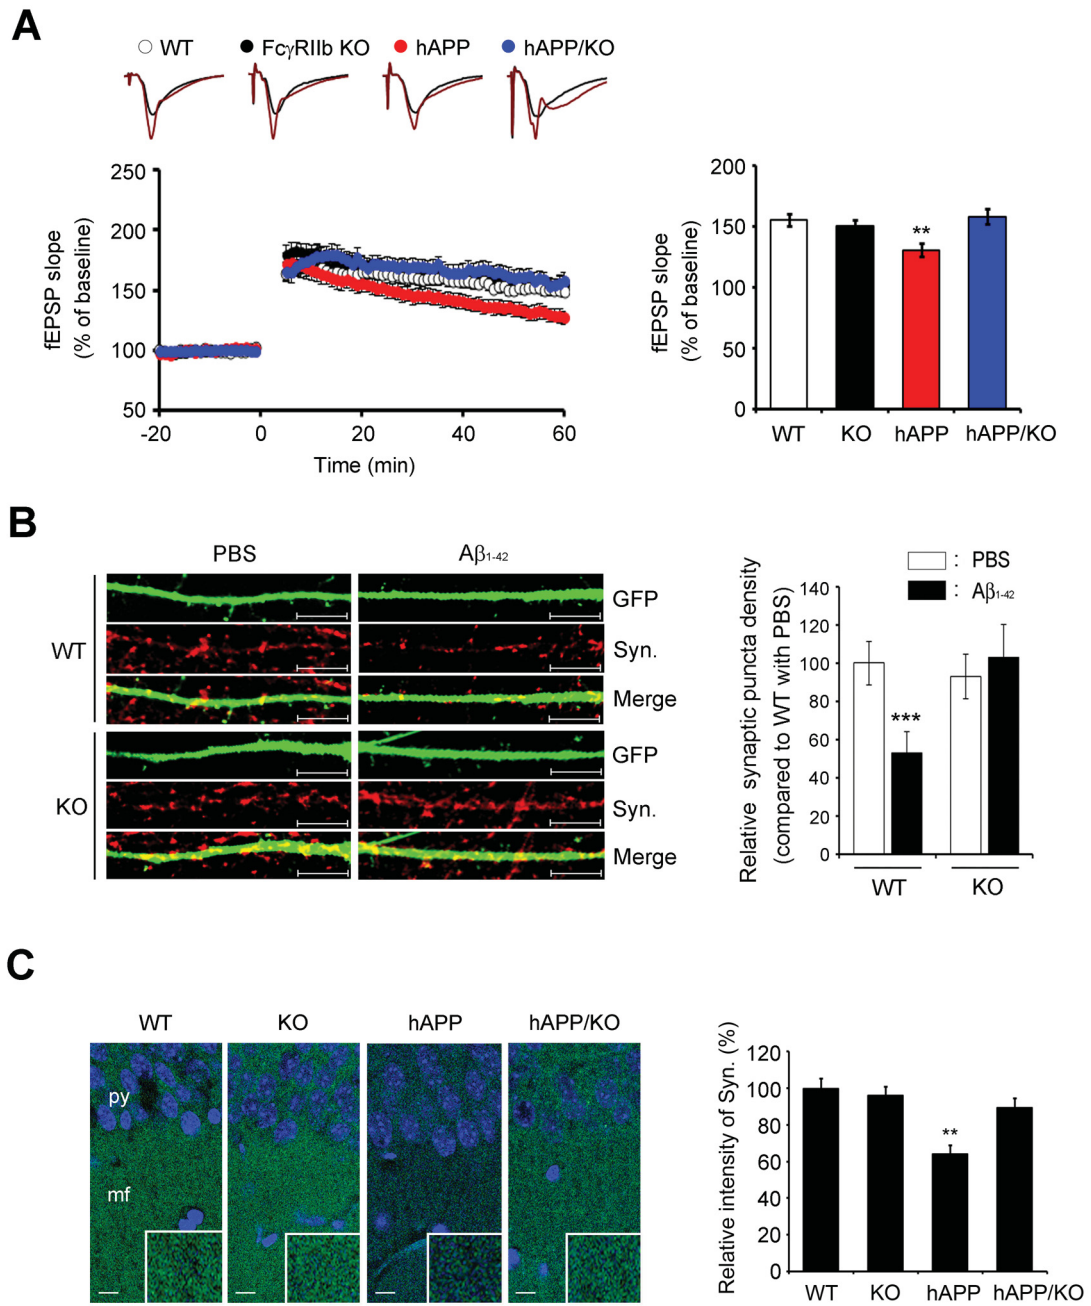

**Supplemental Figure 9.** Requirement of Fc $\gamma$ RIIb in the inhibition of hippocampal LTP and synaptic loss in hAPP mice.

(A) Lack of hippocampal LTP inhibition by Fc $\gamma$ RIIb deficiency in hAPP mice. Field potentials were recorded from the hippocampal slices from 9 to 13 month-old WT (n=23 slices from 5 mice), Fc $\gamma$ RIIb KO (n=17 slices from 5 mice), hAPP (n=14 slices from 4 mice) and hAPP/Fc $\gamma$ RIIb KO (n=10 slices from 5 mice) (*left*). Summary bar graphs represent the magnitude of LTP between 50 and 60 min (*right*). All data shown are mean  $\pm$  s.e.m.;  $**P < 0.005$ , one-way ANOVA. (B) Images represent synaptic clusters in WT and Fc $\gamma$ RIIb KO primary hippocampal neurons. Cultured neurons at 13 DIV were transfected with pEGFP-N1 for 3 days and then exposed to 2  $\mu$ M A $\beta_{1-42}$ . After 2 days, neurons were immunostained for synaptophysin (Syn.). Synaptic sites were identified as both synaptophysin- and GFP-positive puncta (*left*). Both synaptophysin<sup>+</sup> and GFP<sup>+</sup> puncta were counted from 10 randomly chosen dendrites with 100  $\mu$ m in length (*right*). Bars depict mean  $\pm$  s.d.  $***P < 0.0005$ , one-way ANOVA. (C) Prevention of synaptic loss in hAPP/Fc $\gamma$ RIIb KO mice. Images represent the synaptophysin immunoreactivity on CA1 in WT, Fc $\gamma$ RIIb KO, hAPP and hAPP/Fc $\gamma$ RIIb KO mice. py, pyramidal neuron layer; mf, mossy fiber. Scale bar, 10  $\mu$ m (*left*). The synaptophysin<sup>+</sup> intensity was measured by densitometric analysis (*right*). Bars depict mean  $\pm$  s.e.m. (n=10).  $**P < 0.01$ , one-way ANOVA.

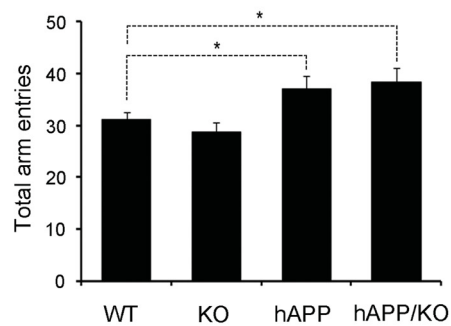

**Supplemental Figure 10.** Fc $\gamma$ RIIb deficiency does not affect the hyperactivity in hAPP mice. Total arm entries in Y-maze test of WT, Fc $\gamma$ RIIb KO, hAPP and hAPP/KO mice were analyzed (n=7-18 mice per group). Asterisk indicates significant difference between WT mice and either hAPP or hAPP/KO mice. No significant difference in total arm entries was observed between WT and KO mice or between hAPP and hAPP/KO mice. Data are mean  $\pm$  s.e.m.; \* $P$  < 0.05 versus WT,  $t$ -test.

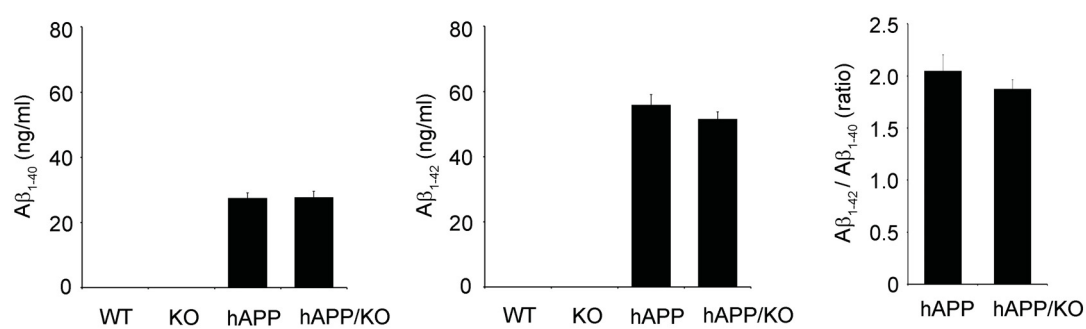

**Supplemental Figure 11.** Aβ levels in the hippocampus of hAPP and hAPP/FcγRIIb KO mice.

Levels of Aβ<sub>1-40</sub> (left), Aβ<sub>1-42</sub> (middle) and Aβ<sub>1-42</sub>/Aβ<sub>1-40</sub> ratio (right) in the hippocampus of 8-month-old WT, FcγRIIb KO, hAPP or hAPP/KO mice were determined by ELISA (n=3). Human APP and hAPP/KO groups did not differ significantly by Student's *t*-test. Values are means ± s.e.m.

**Supplemental Table 1. Relevant clinical information of control and AD subjects**

| <b>Brain</b> | <b>Diagnosis</b> | <b>Age</b> | <b>Sex</b> | <b>PMI<sup>A</sup></b> | <b>Neuronal<br/>loss<sup>B</sup></b> | <b>Senile<br/>plaques<sup>B</sup></b> |
|--------------|------------------|------------|------------|------------------------|--------------------------------------|---------------------------------------|
| 4625         | Normal           | 53         | F          | 24                     | -                                    | -                                     |
| 4725         | Normal           | 58         | F          | 17.8                   | -                                    | -                                     |
| 5081         | Normal           | 60         | F          | 17.58                  | -                                    | -                                     |
| 5083         | Normal           | 38         | M          | 28.83                  | -                                    | -                                     |
| 0704         | Normal           | 82         | F          | 15.70                  | -                                    | -                                     |
| 2921         | Normal           | 89         | F          | 14.12                  | +                                    | -                                     |
| 8396         | Normal           | 76         | M          | 12.25                  | -                                    | -                                     |
| 10180        | Normal           | 73         | M          | 24                     | -                                    | -                                     |
| 10329        | Normal           | 81         | F          | 26.18                  | -                                    | -                                     |
| 7494         | Braak III        | 84         | F          | 8.58                   | -                                    | -                                     |
| 7510         | Braak III        | 82         | M          | 22.08                  | -                                    | +                                     |
| 7525         | Braak III        | 89         | M          | 30.58                  | -                                    | +                                     |
| 7547         | Braak III        | 82         | F          | 17.37                  | -                                    | +                                     |
| 7614         | Braak III        | 84         | F          | 21.67                  | -                                    | +                                     |
| 5258         | Braak V          | 92         | F          | 5                      | +++                                  | ++                                    |
| 5272         | Braak V          | 83         | F          | 19.25                  | +                                    | ++                                    |
| 5273         | Braak V          | 83         | M          | 18                     | ++                                   | +++                                   |
| 5275         | Braak V          | 77         | M          | 11.05                  | -                                    | ++                                    |
| 5290         | Braak V          | 95         | F          | 7.58                   | +++                                  | ++                                    |
| 5842         | Braak V          | 89         | F          | 27                     | +                                    | ++                                    |
| 5279         | Braak VI         | 83         | M          | 25.41                  | ++                                   | ++                                    |

|      |          |    |   |       |     |     |
|------|----------|----|---|-------|-----|-----|
| 5283 | Braak VI | 82 | F | 20.75 | +++ | +++ |
| 5285 | Braak VI | 68 | M | 8.62  | ++  | ++  |
| 6785 | Braak VI | 59 | F | 22.42 | -   | ++  |
| 6803 | Braak VI | 82 | F | 19.17 | ++  | +   |
| 7427 | Braak VI | 76 | F | 12.08 | ++  | ++  |
| 7604 | Braak VI | 64 | F | 17.42 | ++  | +++ |
| 7633 | Braak VI | 82 | F | 27    | +++ | +++ |

| <b>Diagnosis</b> | <b>Mean Age (y) ± s.d.</b> | <b>Sex (F/M)</b> | <b>Mean PMI (h) ± s.d.</b> |
|------------------|----------------------------|------------------|----------------------------|
| Normal           | 67.8 ± 16.5                | 6/3              | 20.1 ± 5.8                 |
| Braak III        | 84.2 ± 2.9                 | 3/2              | 20.1 ± 8.0                 |
| Braak V/VI       | 80.2 ± 10.6                | 10/4             | 16.3 ± 6.7                 |

<sup>A</sup> PMI: Post-mortem interval (h)

<sup>B</sup> - : None, +: Mild, ++: Moderate, +++: Abundant/Severe
